# Supplementary material
Source: publisher site journal article supplement (http://www.degruyter.com/publication/journal_key/PRHZ/downloadAsset/PRHZ_Information%20for%20Authors--en.pdf)
Supplement: Supplementary file 1 [file PRHZ_Information%20for%20Authors--en.pdf]

# SUBMIT

## Praehistorische Zeitschrift

The Journal is published in two issues annually.

All communications, books for review, and manuscripts should be addressed to:

### Dr. Morten Hegewisch

Freie Universität Berlin

Redaktion Praehistorische Zeitschrift

Institut für Prähistorische Archäologie

FB Geschichts- u. Kulturwissenschaften

Fabeckstraße 23-25

14195 Berlin

[hegewisc@zedat.fu-berlin.de](mailto:hegewisc@zedat.fu-berlin.de)

## Manuscript Guidelines

A contribution should not exceed 160,000 characters including spaces, the number of figures should not exceed 20, except in consultation with the editorial office.

All texts start with a summary and keywords in German (can be done by the editorial office) and English, a summary in the national language of the main authors (such as Polish, Italian, etc.) is also desired.

All contributions have one "corresponding author".

All papers are submitted without layout, single column, left justified, figures generally separate and not included in the text.

Headings in the text should have a clear hierarchy, preferably following the scheme #Head 1# for the main heading, #Head 2# for the following first heading (such as "Introduction"). Each subsequent heading lower in the hierarchy should be named accordingly, namely #Head 3#, then #Head 4#. Headings of the same hierarchy level are assigned the same hierarchy level, for example after "Introduction" (= #Head 2#) "The discovery of the site XY" (= #Head 2#) as an example.

All references and other references are mentioned in footnotes, not within the text.

In the footnotes, the literature passages are named exactly, i.e. not: "author name 2022, 38-42", but: "author name 2022, 38-42".

Figure captions should be included in a separate Word file.

Figures in the text are named as: Figure/Fig. and Table (Tab.). Maps (Maps) are also named as figures (Figure/Fig.).

Figures should be submitted in open formats (JPEG, TIFF, BMP, etc.) when possible, not in special or rare formats such as CDR.

Texts are submitted as Word files (DOCX), tables in excel format (XLSX), old formats such as DOC or XLS are to be avoided as they are usually rejected by the servers in the forwarding process.

All figures must be high resolution, at least 300 DPI for color/grayscale figures, or 1200 DPI for b/w line drawings.

Each text concludes with a bibliography. References in Cyrillic script may be mentioned, but they must be transcribed and completed after a "/": Author 2022: Author first and last name, Cyrillic Cyrillic / Latin Latin. Authors' first names are generally abbreviated, publishers are not named (in contrast to citation in Anglo-Saxon countries, for example).

Important: All non-German-language texts must have been checked by a native speaker or a person with the appropriate language skills whom the authors commission.

## **Submission Guidelines**

Further information on manuscript submission to De Gruyter: [Ethical Guidelines](#) and [Copyright Transfer Agreement](#).

Please copy & paste the following sentence into your manuscript submission email:

"By submitting my manuscript for publication by Walter de Gruyter GmbH, I accept the legal framework as stated in the Copyright Transfer Agreement."
